# Supplementary material for: Risk mapping of clonorchiasis in the People’s Republic of China: A systematic review and Bayesian geostatistical analysis
Source: PLoS Negl Trop Dis. 2017 Mar 2;11(3):e0005239. doi: 10.1371/journal.pntd.0005239 (PMC5416880; doi:10.1371/journal.pntd.0005239)
Supplement: S1 Table — (DOCX) [file pntd.0005239.s003.docx]

S1 Table. Posterior Inclusion Probabilities for the Variables Assessed in the Bayesian Variable Selection Procedure.

| Variables | | | Posterior mean of indicators | Selected* |
| --- | --- | --- | --- | --- |
| Land cover | Croplands | | 1.00 | Yes |
| Forest | |
| Shrublands and grass | |
| Urban | |
| Wet areas | |
| Urban extends | rural | | 0.31 | No |
| urban | |
| Annual precipitation | Continuous | | 0.02 | No |
| Categorical | ≤1,200 mm | 0.03 | No |
| >1,200 mm |
| GDP per capita | Continuous | | 0.10 | No |
| Categorical | ≤20,000 yuan | 0.02 | No |
| >20,000 yuan |
| HII | Continuous | | 0.01 | No |
| Categorical | ≤30 | 0.13 | No |
| >30 |
| Soil moisture | Continuous | | 0.29 | No |
| Categorical | ≤100 mm | 0.18 | No |
| >100 mm |
| Elevation | Continuous | | 1.00 | Yes |
| Categorical | ≤100 m | 0.00 | No |
| 100-500 m |
| >500 m |
| NDVI | Continuous | | 1.00 | Yes |
| Categorical | ≤0.45 | 0.00 | No |
| 0.45-0.55 |
| >0.55 |
| Distance to the nearest waterbodies | Continuous | | 0.00 | No |
| Categorical | ≤2.5 km | 0.99 | Yes |
| 2.5-7.0 km |
| >7.0 km |
| PH in water | Continuous | | 0.23 | No |
| Categorical | ≤6 | 0.00 | No |
| 6-7 |
| >7 |
| LST at day | Continuous | | 0.03 | No |
| Categorical | ≤18 ℃ | 0.07 | No |
| 18-23 ℃ |
| >23 ℃ |
| LST at night# | | | - | - |

*Variables with inclusion probabilities higher than 50% were included in the final geostatistical model; #dropped due to high correlation with LST at day and annual precipitation (i.e., correlation coefficient >0.8).
